# Supplementary material for: Enhanced Production of Bacterial Cellulose in Komagataeibacter xylinus Via Tuning of Biosynthesis Genes with Synthetic RBS
Source: PubMed Central journal article supplement (PMC9728265; doi:10.4014/jmb.2006.06026), 2020-07-06
Supplement: JMB-30-9-1430-supple.pdf [file JMB-30-9-1430-supple.pdf]

**Supplementary Table S1.** List of PCR primers used in this study.

| <b>Primer name</b> | <b>Primer sequences (5' to 3')</b>                                               |
|--------------------|----------------------------------------------------------------------------------|
| Fw_sfGFP           | TGCTAGCTACTAGTGAAAGAGGAGAAATACCATATGCA<br>TCACCATCACCATCACATGAGCAAAGGAGAAGAACTTT |
| Rv_sfGFP-          | ATGACTCTGCAGAACGCATGAGAAAGCCCCCGGAAGAT                                           |
| ECK120033736       | CACCTTCCGGGGGCTTTTTTATTGCCTCGAGTTATTATTT                                         |
| Fw_Lib             | CTAGCTACTAGTNNNNNNNNNNNTACCATATGCATCA<br>CCATCACC                                |
| Rv_sfGFP           | AGCGCTCGAGTTATTATTTGTAGAGCTCATCCATGCC                                            |
| Fw_Seq_pDHJC       | AGGCCAGTCTTTTCGACTG                                                              |
| Rv_Seq_pDHJC       | TATCAACGGTGGTATATCCAGTGA                                                         |
| Fw_pgm             | ACACACGAAGACCATATGCCAGCGTAAGCCCTTT                                               |
| Rv_pgm             | GTGTCTCGAGTTATCAATGGTGATGGTGATGGTGCTTCT<br>GCGCAGCCTTGGCAA                       |
| Fw_galU            | ACACGGTCTCATATGATTAAGCCCCTTAAAAAAGCCGTA<br>TTG                                   |
| Rv_galU            | GTGTGGTCTCCTCGAGTTATCAATGGTGATGGTGATGGT<br>GTTTATACTTTTTGAGGAATTCCCGCACG         |
| Fw_ndp             | ACACGGTCTCATATGGCAGTCGAACGTACCCTCTCCATC                                          |
| Rv_ndp             | GTGTGGTCTCCTCGAGTTATCAATGGTGATGGTGATGGT<br>GGGGCAGGATCTCGGTGCCGG                 |
| Fw_GibV_pDHJCR1    | CTCGAGGCAATAAAAAAGCCCCCG                                                         |
| Rv_GibV_pDHJCR15   | CTATCGTCCTAGTCCCTACTGCTAGCACAAATACCTAGGA<br>CTGAGCTAG                            |
| Fw_Gib1_R15_pgm    | AGTAGGGACTAGGACGATAGTACTAGTTAATGAGAGGC<br>CTACCATATGCCAG                         |
| Rv_Gib1_pgm        | TGACGTGTAACCTCGATTGATCTCGAGTTATCAATGGTGA<br>TGGTGATGGTGC                         |
| Fw_Gib2_R15_galU   | ATCAATCGAGTTACACGTCATACTAGTTAATGAGAGGCC<br>TACCATATGATTAAGCCCC                   |
| Rw_Gib2_galU       | CACTAGTTCCGAGACTGTACCTCGAGTTATCAATGGTGA<br>TGGTGATGGTGTTTATACTTT                 |
| Fw_Gib3_R15_ndp    | GTACAGTCTCGGAACTAGTGTACTAGTTAATGAGAGGCC<br>TACCATATGGCAGTCG                      |
| Rv_Gib3_ndp        | ACCTTCCGGGGGCTTTTTTATTGCCTCGAG                                                   |

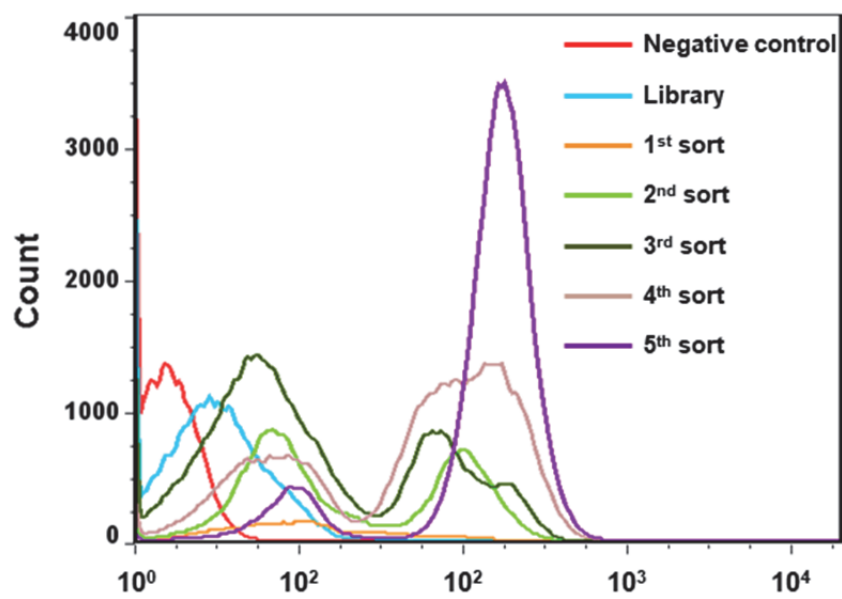

**Supplementary Figure S1.** FACS analysis of recombinant *K. xylinus* harboring RBS library.

Totally 50,000 cells were counted for the analysis of negative control, library, 1<sup>st</sup> sort and 2<sup>nd</sup> sort, and 100,000 cells were counted for the analysis of 3<sup>rd</sup> sort, 4<sup>th</sup> sort and 5<sup>th</sup> sort.

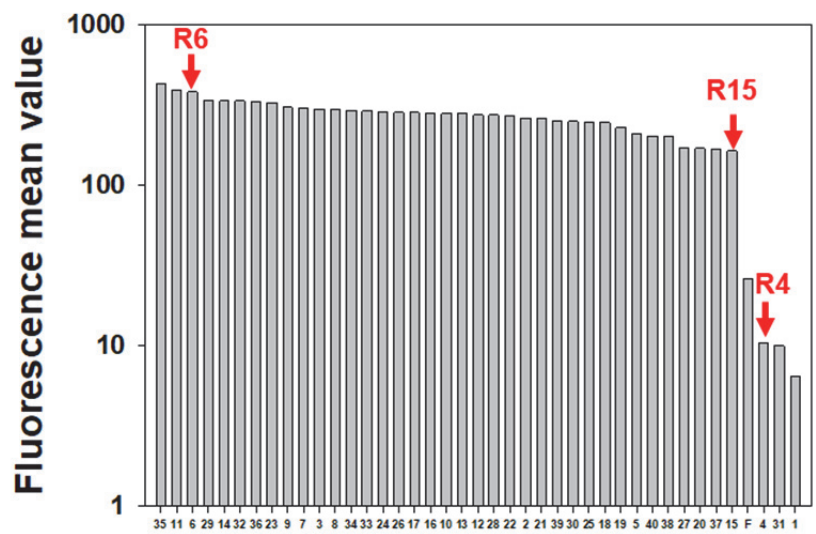

**Supplementary Figure S2.** Fluorescence mean values of single recombinant *K. xylinus* clones harboring RBS library from the FACS analysis

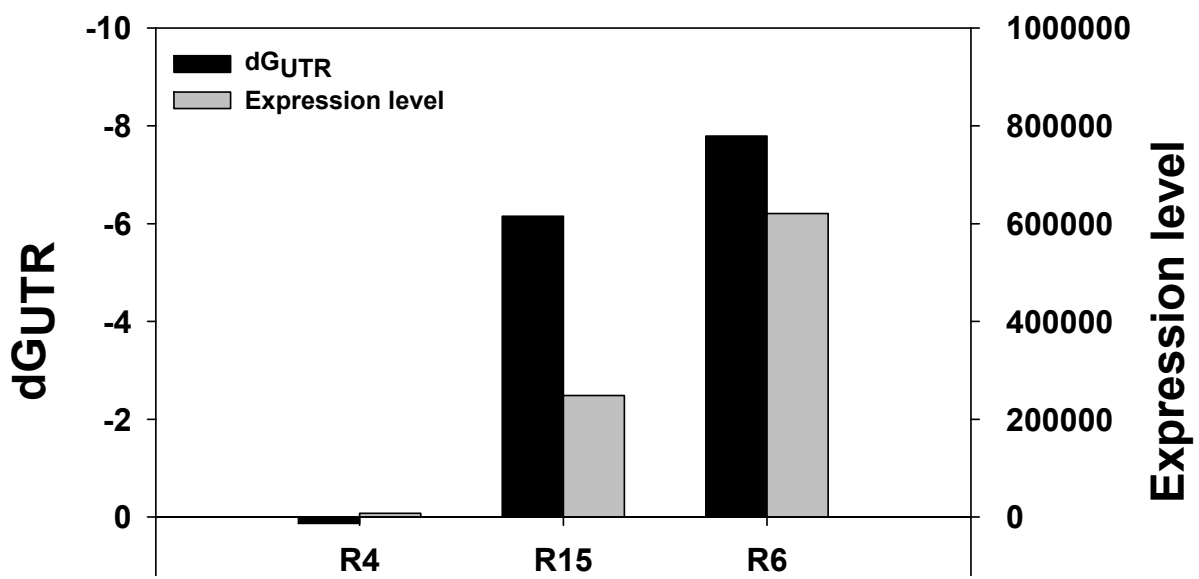

**Supplementary Figure S3.** Thermodynamic analysis of newly isolated RBSes and sfGFP gene
